# Supplementary material for: Individuality across environmental context in Drosophila melanogaster
Source: eLife journal article supplement (doi:10.7554/elife.98171), 2024-07-08
Supplement: supp1 [file elife-98171-supp1-v1.pdf]

| Parameter                    | Description                                                                                                                                                                                                                                                                                                                                                                                                                                                                                                     |
|------------------------------|-----------------------------------------------------------------------------------------------------------------------------------------------------------------------------------------------------------------------------------------------------------------------------------------------------------------------------------------------------------------------------------------------------------------------------------------------------------------------------------------------------------------|
| roinr                        | Arena number for fly identification.                                                                                                                                                                                                                                                                                                                                                                                                                                                                            |
| sex                          | Male = 0, female = 1.                                                                                                                                                                                                                                                                                                                                                                                                                                                                                           |
| euclidsum                    | Total distance walked in mm.                                                                                                                                                                                                                                                                                                                                                                                                                                                                                    |
| perctimemoving               | % of time spent walking.                                                                                                                                                                                                                                                                                                                                                                                                                                                                                        |
| numberpauses                 | Number of pauses (min pause length = 1s).                                                                                                                                                                                                                                                                                                                                                                                                                                                                       |
| medianpausedurationsec       | Median pause duration in s.                                                                                                                                                                                                                                                                                                                                                                                                                                                                                     |
| meanspeedmov                 | Mean walking speed in mm/s.                                                                                                                                                                                                                                                                                                                                                                                                                                                                                     |
| mediananglecentermoving      | Median walking angle (heading direction) between 0° and 360° in the center region of the arena as seen from the animal.                                                                                                                                                                                                                                                                                                                                                                                         |
| mediananglecenteraxialmoving | Median walking angle (heading direction) between 0° and 180° (axial) in the center region of the arena as seen from the animal. Axial transformation of angular data was achieved by subtracting 180° from all angles larger than 180°. Axial data is more robust against cancelling -out of opposing angles in median calculations, e.g. when a fly is walking back and forth between stripes.                                                                                                                 |
| stddeviation                 | Standard deviation of angular data in ° as seen from the animal. Low angular standard deviation indicates a smaller range of chosen heading directions. Contains only data points where the animal was walking in the center region of the arena.                                                                                                                                                                                                                                                               |
| rlength                      | Resulting vector length of angular data mapped between 0° and 360°. A vector length of 0 would indicate uniform distribution of heading angles. A vector length of 1 would indicate the animal was only moving in a perfectly straight path. Contains only data points where the animal was walking in the center region of the arena.                                                                                                                                                                          |
| rlengthax                    | Resulting vector length of angular data mapped between between 0° and 180° (axial) . A vector length of 0 would indicate uniform distribution of heading angles. A vector length of 1 would indicate the animal was only moving in a perfectly straight path. Contains only data points where the animal was walking in the center region of the arena. Axial data is more robust against cancelling -out of opposing angles in median calculations, e.g. when a fly is walking back and forth between stripes. |
| medianangvelmovalldegs       | Median angular velocity (angular speed of azimuthal rotation) when walking in °/s. Median angular velocity is also a measure of handedness. Positive values indicate right turns and negative values indicate left turns as seen from the animal.                                                                                                                                                                                                                                                               |
| medianangvelmovcenterdegs    | Median angular velocity (angular speed of azimuthal rotation) when walking in the center region of the arena in °/s. Median angular velocity is also a measure of handedness. Positive values indicate right turns and negative values indicate left turns as seen from the animal.                                                                                                                                                                                                                             |
| medianangvelmovouterdegs     | Median angular velocity (angular speed of azimuthal rotation) when walking in the edge region of the arena in °/s. Median angular velocity is also a measure of handedness. Positive values indicate right turns and negative values indicate left turns as seen from the animal.                                                                                                                                                                                                                               |
| absturninganglesum           | Sum of all walking heading changes in °. Divided by distance walked this can be used as a measure for „meandering“ (heading change per mm walked in °/mm).                                                                                                                                                                                                                                                                                                                                                      |
| absturninganglesumcenter     | Sum of all walking heading changes within the center region of the arena in °. Divided by distance walked this can be used as a measure for „meandering“ (heading change per mm walked in °/mm).                                                                                                                                                                                                                                                                                                                |
| centrophobicindex            | Centrophobicity index between 0 and 1. 0 indicates an animal being in the center area 100% of the time. 1 indicates an animal being in the edge area 100% of the time.                                                                                                                                                                                                                                                                                                                                          |
| pecflymorethanone            | % of time with more than two objects detected per arena. This parameter indicates false animal detections (e.g dust) and is useful for validating tracking quality or finding tracking errors.                                                                                                                                                                                                                                                                                                                  |
| pecflylost                   | % of time the tracker lost an animal. This parameter is useful for validating tracking quality or finding tracking errors.                                                                                                                                                                                                                                                                                                                                                                                      |
| stripedeviationmedian        | Applies to Buridan data. Median angular distance to the closest (in terms of azimuthal rotation) stripe when walking in the center of the arena in °.                                                                                                                                                                                                                                                                                                                                                           |
| turnsnumber                  | Applies to Y -maze data. Number of turns. One turn is defined as an animal (measured at center point) walking from one Y-maze arm 3mm into another.                                                                                                                                                                                                                                                                                                                                                             |
| turnsbias                    | Ratio of right VS left turns. Values larger than 0.5 indicate right -handedness. Values smaller than 0.5 indicate left-handedness.                                                                                                                                                                                                                                                                                                                                                                              |
