# Supplementary material for: Individuality across environmental context in Drosophila melanogaster
Source: eLife journal article supplement (doi:10.7554/elife.98171), 2024-07-08
Supplement: supp2 [file elife-98171-supp2-v1.pdf]

| <b>LED Buridan Setup</b>    |                                                                                                                                                            |               |
|-----------------------------|------------------------------------------------------------------------------------------------------------------------------------------------------------|---------------|
| <b>Nr</b>                   | <b>Description</b>                                                                                                                                         | <b>Amount</b> |
| 1                           | Flir Firefly S FFY-U3-04S2M-C + Edmund optics UC Series Fixed Focal Length Objective (8mm, Stock #33-307)                                                  | 1             |
| 2                           | Acrylic plate white opaque matt 500 x 410 x 3 mm (30mm circular hole in center)                                                                            | 1             |
| 3                           | Clear acrylic cylinder (300mm diameter, 300mm height) + diffuser paper or satinice acrylic cylinder (300mm diameter, 300mm height)                         | 1             |
| 4                           | Fluorescent tubes (Osram, L 40w, 640C circular cool white) + Osram QT-M 1626-42 controller for AC flicker rate >1kHz                                       | 4             |
| 5                           | Aluminium profiles black (45 x 45 mm) P45N10LS www.aluprofile24.de:                                                                                        |               |
|                             | 400mm + thread M12 (min 100mm) profile                                                                                                                     | 4             |
|                             | 480mm profile                                                                                                                                              | 2             |
|                             | 485mm profile                                                                                                                                              | 1             |
|                             | + Construction accessories www.aluprofile24.de:                                                                                                            |               |
|                             | WI45x45 angle                                                                                                                                              | 10            |
|                             | IWIN10 angle                                                                                                                                               | 20            |
|                             | BuMuM8 nut screw                                                                                                                                           | 20            |
|                             | FußD40DG m12x100 feet                                                                                                                                      | 4             |
|                             | + BitFenix Spectre PRO 230 mm mounted between aluminium rails on 2 opposing sides of the setup for cooling the LED matrix                                  | 8             |
| 6                           | 6x RGB LED matrix (128 x 64 pixel) www.ledall.de 1x Hdmi controller Novastar mctrl 660 pro + 1x Novastar A8S receiving card 6x                             | 1             |
|                             | + Famotec locating ring 3mm inner diameter (EAN: 4053199955619) + grub screw M3 x 20mm for fixing LED matrix to the LED cylinder                           | 150           |
| 7                           | Transparent acrylic dome 120mm diameter (www.architekturbedarf.de) coated with Sigmacote on the inside                                                     | 1             |
| 8                           | PLEXIGLAS® WH10 DC white snow satinice disk 119 x 119 x 10 mm + 850nm LED strip wrapped around edge for backlight illumination                             | 1             |
| 9                           | Acrylic plate white opaque matt 500 x 500 x 3 mm (120mm circular hole in center)                                                                           | 1             |
| 10                          | PLEXIGLAS® WH10 DC white snow satinice 500 x 500 x 3 mm                                                                                                    | 1             |
| 11                          | PLEXIGLAS® WH10 DC white snow satinice disk 119 x 119 x 10 mm + 850nm LED strip (www.ledxess.de) wrapped around edge for backlight illumination            | 1             |
| 12                          | PLEXIGLAS® WH10 DC white snow satinice 500 x 500 x 10 mm (300mm circular hole in center)                                                                   | 2             |
|                             |                                                                                                                                                            |               |
|                             |                                                                                                                                                            |               |
| <b>IndyTrax Setup</b>       |                                                                                                                                                            |               |
| <b>Nr</b>                   | <b>Description</b>                                                                                                                                         | <b>Amount</b> |
| 13                          | 120x12mm EEC0381B1-000U-A99 Sunon                                                                                                                          | 4             |
| 14                          | 880nm infrared backlight https://www.amazon.de/LED-Lichttherapie-Dunkelrotes-Infrarot-LED-Lichttherapie-Panel-Hautverj%C3%BCngung-Druckentlastung/dp/B07ZQ | 1             |
| 15                          | Server cabinet https://www.serverschrank24.de/15-he-serverschrank-wandgehause-mit-glastur-btxh-600-x-450-x-820-mm.html                                     | 1             |
| 16                          | Translucent acrylic cylinder https://www.kus-kunststofftechnik.de/plexiglas-rohr/plexiglasxt-satinier-o-60-mm-laenge-waehlb-100-bis-1400-mm/               | 25            |
| 16                          | Electroluminescent foil A7 white                                                                                                                           | 50            |
| 16                          | Transparent dome 50mm https://www.dekowellcreativ.de/acrylkugel-transparent-teilbar-stueck/p-3330.html                                                     | 25            |
| 16                          | Plexiglas GS white 70% 3mm WH10 49mm diameter https://www.plattenzuschnitt24.de/Plexiglas-GS-weiss-WH10-GT-3mm.html                                        | 50            |
| 17                          | 19" drawer https://www.it-budget.de/19-Fachboden-ausziehbar-Vollauszug-Tragkraft-30-kg-350-mm-schwarz                                                      | 2             |
| 18                          | Camera Point Grey BFLY-PGE-23S6C-C mounted on Rack chassis 24563-194nVent – Schroff                                                                        | 1             |
| 18                          | Objective LM8HC3HOLE 1" 8mm/F1.4                                                                                                                           | 1             |
| 19                          | BitFenix Spectre PRO 230 mm                                                                                                                                | 2             |
| 20                          | Carbon heater https://thermowelt.de/Artikel/carbonheater1-1GN-220V.html                                                                                    | 1             |
|                             |                                                                                                                                                            |               |
| <b>Controllers</b>          | Humidity controller TXG top-messtechnik.com TMT-HC-210 controls 40x40mm Sunon EE40101S1-1000U-999 Axiallüfter 12 V/DC placed on (4)                        | 1             |
|                             | PID temperature controller pohltechnik.com RT4-121-Tr21Sd controls (20)                                                                                    | 1             |
|                             | VOLTCRAFT LSP-1165 for controlling IR LED panel (14) and fans (18, 19)                                                                                     | 2             |
|                             | TT COMMANDER FT for cooling down enclosure, if necessary (controls enclosure fans (13))                                                                    | 1             |
|                             | Inverter https://www.el-light.shop/epages/17778431.sf/de_DE/?ObjectPath=/Shops/17778431/Products/InF1S150 controls el-foil (16) brightness                 | 1             |
|                             |                                                                                                                                                            |               |
|                             |                                                                                                                                                            |               |
| <b>LED flight simulator</b> |                                                                                                                                                            |               |
| <b>Nr</b>                   | <b>Description</b>                                                                                                                                         | <b>Amount</b> |
| 21                          | Aluminium profiles black (30 x 30 mm) P30N8 www.aluprofile24.de:                                                                                           |               |
|                             | 600mm profile                                                                                                                                              | 4             |
|                             | 165mm profile                                                                                                                                              | 10            |
|                             | 200mm profile                                                                                                                                              | 2             |
|                             | + Construction accessories www.aluprofile24.de:                                                                                                            |               |
|                             | PADK30N8B cap                                                                                                                                              | 4             |
|                             | IWIN8B angle                                                                                                                                               | 25            |
|                             | BuMuM6 nut screw                                                                                                                                           | 10            |
|                             | WI30N8B                                                                                                                                                    | 10            |
|                             | HaKoM6 (12mm)                                                                                                                                              | 20            |
| 22                          | optional servo motor for dorsal stimulus presentation (Dynamixel MX-12W) + ball bearing 6811-ZZ (www.kugellager-express.de)                                | 1             |
| 23                          | 4x RGB LED matrix (128 x 64 pixel) www.ledall.de + 1x Hdmi controller Novastar mctrl 660 pro + 1x Novastar A8S receiving card                              | 1             |
|                             | + Famotec locating ring 3mm inner diameter (EAN: 4053199955619) + grub screw M3 x 20mm for fixing LED matrix to the LED cylinder                           | 150           |
| 24                          | Neodymium cylinder magnet (5mm diameter, 20mm height) + white plastic cap + 1mm diameter v-shaped sapphire bearing in center for friction reduction        | 1             |
| 25                          | Neodymium ring magnet (10mm diameter, 5mm height, inner diameter 5mm) + white plastic cap                                                                  | 1             |
| 26                          | 850nm near infrared LED array (https://www.amazon.de/POFET-Infrarot-IR-LED-850-nm-Platinenmodul-f%C3%BCr-das-Kamera%C3%Bcberwachungssystem)                | 1             |
| 27                          | Flir Firefly S FFY-U3-04S2M-C + Edmund optics UC Series Fixed Focal Length Objective (12mm, Stock #33-307)                                                 | 1             |
|                             |                                                                                                                                                            |               |
| <b>Air puffs</b>            | Arduino UNO Rev3 + relais module + Schego membrane pump 300l/h                                                                                             | 1             |
