# Supplementary material for: Individuality across environmental context in Drosophila melanogaster
Source: eLife journal article supplement (doi:10.7554/elife.98171), 2024-07-08
Supplement: supp3 [file elife-98171-supp3-v1.pdf]

| <b>Walking</b> |          |          |          |      |           |          |          |                                 |
|----------------|----------|----------|----------|------|-----------|----------|----------|---------------------------------|
| Name           | Estimate | SE       | tStat    | DF   | pValue    | Lower    | Upper    | Trait                           |
| (Intercept)    | -36.0989 | 1.703036 | -21.1968 | 2977 | 5.45E-93  | -39.4381 | -32.7596 | % of time walked                |
| Day            | 0.114762 | 0.525089 | 0.218558 | 2977 | 0.827009  | -0.91481 | 1.144337 | % of time walked                |
| Temp_C         | 1.641446 | 0.045068 | 36.4213  | 2977 | 1.57E-240 | 1.553078 | 1.729814 | % of time walked                |
| StripeNum      | 2.287736 | 0.401177 | 5.702555 | 2977 | 1.30E-08  | 1.501123 | 3.074349 | % of time walked                |
| Illumination   | 4.202395 | 0.644612 | 6.519264 | 2977 | 8.27E-11  | 2.938465 | 5.466325 | % of time walked                |
| ArenaType      | -0.18729 | 0.782171 | -0.23945 | 2977 | 0.81077   | -1.72094 | 1.346356 | % of time walked                |
| (Intercept)    | 8.535013 | 0.29851  | 28.59203 | 2906 | 1.19E-158 | 7.9497   | 9.120327 | Walking speed (in mm/s)         |
| Day            | 0.708806 | 0.085192 | 8.32006  | 2906 | 1.33E-16  | 0.541762 | 0.87585  | Walking speed (in mm/s)         |
| Temp_C         | 0.228039 | 0.008173 | 27.89993 | 2906 | 5.54E-152 | 0.212013 | 0.244066 | Walking speed (in mm/s)         |
| StripeNum      | 0.582187 | 0.071393 | 8.154717 | 2906 | 5.15E-16  | 0.442202 | 0.722173 | Walking speed (in mm/s)         |
| Illumination   | 0.57637  | 0.114911 | 5.015818 | 2906 | 5.60E-07  | 0.351056 | 0.801685 | Walking speed (in mm/s)         |
| ArenaType      | -3.52742 | 0.130363 | -27.0584 | 2906 | 5.31E-144 | -3.78303 | -3.2718  | Walking speed (in mm/s)         |
| (Intercept)    | 0.740154 | 0.033723 | 21.94792 | 2660 | 2.87E-98  | 0.674028 | 0.80628  | Vector strength                 |
| Day            | 0.039671 | 0.008519 | 4.656816 | 2660 | 3.37E-06  | 0.022967 | 0.056375 | Vector strength                 |
| Temp_C         | -0.02178 | 0.000899 | -24.2139 | 2660 | 3.19E-117 | -0.02354 | -0.02002 | Vector strength                 |
| StripeNum      | 0.115137 | 0.007552 | 15.24591 | 2660 | 2.22E-50  | 0.100329 | 0.129946 | Vector strength                 |
| Illumination   | -0.04424 | 0.011957 | -3.70031 | 2660 | 0.00022   | -0.06769 | -0.0208  | Vector strength                 |
| ArenaType      | 0.000995 | 0.013366 | 0.074413 | 2660 | 0.940687  | -0.02521 | 0.027204 | Vector strength                 |
| (Intercept)    | 6.076388 | 4.194318 | 1.448719 | 2093 | 0.147566  | -2.14908 | 14.30186 | Angularvelocity (in °/s)        |
| Day            | 0.724146 | 0.969316 | 0.747069 | 2093 | 0.455106  | -1.17678 | 2.625069 | Angularvelocity (in °/s)        |
| Temp_C         | -0.14832 | 0.121757 | -1.21813 | 2093 | 0.223311  | -0.38709 | 0.090461 | Angularvelocity (in °/s)        |
| StripeNum      | 0.153049 | 0.930464 | 0.164487 | 2093 | 0.869364  | -1.67168 | 1.97778  | Angularvelocity (in °/s)        |
| Illumination   | -1.77591 | 1.572772 | -1.12916 | 2093 | 0.258959  | -4.86027 | 1.308446 | Angularvelocity (in °/s)        |
| ArenaType      | 0.471883 | 1.721123 | 0.274171 | 2093 | 0.78398   | -2.90341 | 3.847173 | Angularvelocity (in °/s)        |
| (Intercept)    | 1.016901 | 0.038389 | 26.48924 | 2981 | 4.94E-139 | 0.941629 | 1.092173 | Centrophobicity                 |
| Day            | -0.02827 | 0.009991 | -2.82914 | 2981 | 0.004699  | -0.04786 | -0.00868 | Centrophobicity                 |
| Temp_C         | 0.0064   | 0.001061 | 6.031474 | 2981 | 1.82E-09  | 0.00432  | 0.008481 | Centrophobicity                 |
| StripeNum      | 0.023118 | 0.008831 | 2.617863 | 2981 | 0.008893  | 0.005803 | 0.040433 | Centrophobicity                 |
| Illumination   | -0.05418 | 0.014117 | -3.83793 | 2981 | 0.000127  | -0.08186 | -0.0265  | Centrophobicity                 |
| ArenaType      | -0.33056 | 0.015574 | -21.2253 | 2981 | 3.16E-93  | -0.3611  | -0.30002 | Centrophobicity                 |
|                |          |          |          |      |           |          |          |                                 |
|                |          |          |          |      |           |          |          |                                 |
| <b>Flight</b>  |          |          |          |      |           |          |          |                                 |
| Name           | Estimate | SE       | tStat    | DF   | pValue    | Lower    | Upper    | Trait                           |
| (Intercept)    | 1.405556 | 1.082089 | 1.298927 | 177  | 0.195658  | -0.7299  | 3.541013 | Number of pauses                |
| Day            | -0.05556 | 0.519965 | -0.10684 | 177  | 0.915033  | -1.08168 | 0.970573 | Number of pauses                |
| Contrast       | 0.725    | 0.318412 | 2.276924 | 177  | 0.023988  | 0.096627 | 1.353373 | Number of pauses                |
| (Intercept)    | 585.0846 | 125.6295 | 4.657222 | 177  | 6.27E-06  | 337.1601 | 833.0091 | Abs ang velocity sum (in °/min) |
| Day            | 5.265697 | 57.14176 | 0.092151 | 177  | 0.926682  | -107.501 | 118.0325 | Abs ang velocity sum (in °/min) |
| Contrast       | 61.74883 | 34.99204 | 1.764654 | 177  | 0.079347  | -7.30646 | 130.8041 | Abs ang velocity sum (in °/min) |
| (Intercept)    | 0.9028   | 0.019721 | 45.77796 | 177  | 4.87E-100 | 0.863881 | 0.94172  | Vector strength                 |
| Day            | -0.01242 | 0.009861 | -1.25997 | 177  | 0.209338  | -0.03188 | 0.007035 | Vector strength                 |
| Contrast       | 0.021463 | 0.006038 | 3.554403 | 177  | 0.000486  | 0.009546 | 0.033379 | Vector strength                 |
| (Intercept)    | 0.703611 | 0.741426 | 0.948997 | 177  | 0.343916  | -0.75956 | 2.166784 | Angular velocity (in °/s)       |
| Day            | -0.51914 | 0.329735 | -1.57442 | 177  | 0.117176  | -1.16986 | 0.131577 | Angular velocity (in °/s)       |
| Contrast       | -0.07577 | 0.20192  | -0.37525 | 177  | 0.70792   | -0.47425 | 0.32271  | Angular velocity (in °/s)       |
| (Intercept)    | 218.6298 | 8.189625 | 26.69595 | 177  | 5.80E-64  | 202.468  | 234.7917 | Heading (in °)                  |
| Day            | -4.84511 | 4.094813 | -1.18323 | 177  | 0.238304  | -12.926  | 3.235827 | Heading (in °)                  |
| Contrast       | -44.6257 | 2.50755  | -17.7965 | 177  | 2.79E-41  | -49.5742 | -39.6772 | Heading (in °)                  |
